# Supplementary material
Source: MDPI journal article supplement (https://www.mdpi.com/2073-4395/12/1/125)
Supplement: s1 [file s1]

## Supplementary Material

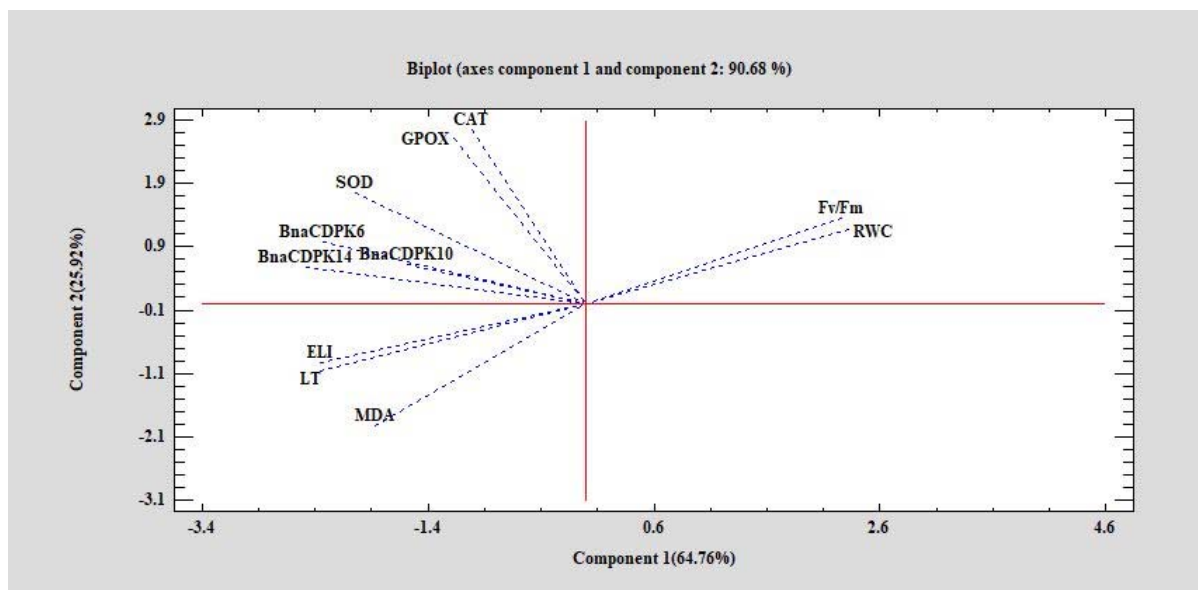

**Figure S1.** Principal component analysis (PCA) of physiological and biochemical parameters and *BnaCDPK* genes expression in canola genotypes.

**Table S1.** Analysis of variance of leaf relative water content (RWC), electrolyte leakage index (ELI), malondialdehyde (MDA), leaf temperature (LT), maximum quantum yield of PSII ( $F_v/F_m$ ), antioxidant enzymes SOD, GPOX and CAT, and *Brassica napus* calcium-dependent protein kinases *BnaCDPK6*, *BnaCDPK10* and *BnaCDPK14* relative gene expression in canola cultivars under drought stress.  $P < .05$  (\*);  $P < .01$  (\*\*); not significant (ns).

| S.O.V.                    | df | Mean of square |           |        |          |           |        |        |        |              |                     |                     |
|---------------------------|----|----------------|-----------|--------|----------|-----------|--------|--------|--------|--------------|---------------------|---------------------|
|                           |    | RWC            | ELI       | MDA    | LCT      | $F_v/F_m$ | SOD    | GPOX   | CAT    | <i>CDPK6</i> | <i>CDPK10</i>       | <i>CDPK14</i>       |
| <b>Cultivar</b>           | 3  | 144.27**       | 67.60**   | 0.20** | 35.41**  | 0.0005**  | 2.29** | 7.46** | 1.40** | 0.15**       | 0.017 <sup>ns</sup> | 0.06**              |
| <b>Drought</b>            | 2  | 3292.86**      | 5000.28** | 2.47** | 1203.6** | 0.008**   | 8.89** | 4.00** | 0.40** | 1.29**       | 1.02**              | 2.73**              |
| <b>Cultivar × Drought</b> | 6  | 29.43**        | 21.82**   | 0.16** | 11.53**  | 0.0002**  | 1.08** | 4.41** | 0.51** | 0.047**      | 0.01 <sup>ns</sup>  | 0.029 <sup>ns</sup> |
| <b>Error</b>              | 24 | 4.29           | 1.28      | 0.002  | 2.21     | 0.00001   | 0.07   | 0.03   | 0.01   | 0.017        | 0.014               | 0.016               |
| <b>CV (%)</b>             |    | 12.91          | 10.25     | 10.3   | 10.80    | 0.4       | 7.75   | 11.44  | 12.41  | 9.73         | 9.16                | 8.44                |

**Table S2.** Gene Ontology of *BnaCDPK* genes.

| Gene (GenBank accession number)       | Arabidopsis homolog (AGI accession number) | GO - Molecular Function                                                                                                                                                                                                                                                             | GO - Biological Process                                                                                                                   | GO - Cellular Component                       |
|---------------------------------------|--------------------------------------------|-------------------------------------------------------------------------------------------------------------------------------------------------------------------------------------------------------------------------------------------------------------------------------------|-------------------------------------------------------------------------------------------------------------------------------------------|-----------------------------------------------|
| <i>BnaCDPK6</i><br>(JX122912)         | <i>AtCPK6</i><br>(AT2G17290)               | Calcium ion binding, ATP binding, protein kinase activity, kinase activity, transferase activity, nucleotide binding, metal ion binding, calmodulin binding, calmodulin-dependent protein kinase activity                                                                           | Protein phosphorylation, phosphorylation, peptidyl-serine phosphorylation, protein autophosphorylation, intracellular signal transduction | Nucleus, cytoplasm                            |
| <i>BnaCDPK10</i><br>(JX122900)        | <i>AtCPK10</i><br>(AT1G18890)              | Kinase activity, ATP binding, transferase activity, nucleotide binding, metal ion binding, calcium ion binding, protein kinase activity                                                                                                                                             | Phosphorylation, protein phosphorylation                                                                                                  | -                                             |
| <i>BnaCDPK14*</i><br>(XM_013896624.2) | <i>AtCPK14*</i><br>(AT2G41860)             | Calmodulin binding, calmodulin-dependent protein kinase activity, calcium ion binding, ATP binding, protein kinase activity, kinase activity, transferase activity, protein serine/threonine kinase activity, nucleotide binding, metal ion binding, protein serine kinase activity | Peptidyl-serine phosphorylation, protein autophosphorylation, intracellular signal transduction, protein phosphorylation                  | Nucleus, plasma membrane, membrane, cytoplasm |

\*The Arabidopsis homolog, *AtCDPK14*, was used here as there was not sufficient information was available for *BnaCDPK14*.

**Table S3.** Simple correlation coefficients.

| Trait     | Fv/Fm   | RWC     | ELI    | LT     | MDA   | SOD    | GPX    | CAT   | BnaCDPK6 | BnaCDPK10 | BnaCDPK14 |
|-----------|---------|---------|--------|--------|-------|--------|--------|-------|----------|-----------|-----------|
| Fv/Fm     | 1       |         |        |        |       |        |        |       |          |           |           |
| RWC       | .981**  | 1       |        |        |       |        |        |       |          |           |           |
| ELI       | -.967** | -.956** | 1      |        |       |        |        |       |          |           |           |
| LT        | -.968** | -.992** | .934** | 1      |       |        |        |       |          |           |           |
| MDA       | -.926** | -.882** | .916** | .855** | 1     |        |        |       |          |           |           |
| SOD       | -.469   | -.544   | .589*  | .561   | .237  | 1      |        |       |          |           |           |
| GPX       | -.073   | -.115   | .231   | .125   | -.142 | .870** | 1      |       |          |           |           |
| CAT       | .016    | -.010   | .132   | .049   | -.186 | .772** | .891** | 1     |          |           |           |
| BnaCDPK6  | -.684*  | -.709** | .756** | .736** | .517  | .881** | .657*  | .686* | 1        |           |           |
| BnaCDPK10 | -.418   | -.535   | .358   | .616*  | .169  | .601*  | .276   | .336  | .611*    | 1         |           |
| BnaCDPK14 | -.799** | -.830** | .859** | .848** | .612* | .889** | .605*  | .559  | .955**   | .637*     | 1         |

\*\*Correlation is significant at the 0.01 level (2-tailed).

\* Correlation is significant at the 0.05 level (2-tailed).
